# Supplementary material for: The synaptic ribbon is critical for sound encoding at high rates and with temporal precision
Source: eLife journal article supplement (doi:10.7554/elife.29275), 2018-01-12
Supplement: supp [file Example Spot Intensity IntensROI Result.xlsx]

## Sheet: IntensSyn
IntensForAllChannel			DoBackground
			+/-ROI	3	3	0		+/-ROI FWHM	10	10	3		ImageSize	1143	359	23
chan 1
SynXposPx	SynYposPx	SynZposPx	IntensChan1
6	292	14	2362
23	291	14	1595
26	294	15	2044
30	149	6	1278
31	291	15	1344
34	154	22	991
40	278	13	862
50	286	16	1821
72	250	15	821
75	243	14	1443
105	215	6	3415
115	209	7	4900
130	205	11	6032
131	205	8	5430
138	157	19	1274
137	123	21	860
142	202	12	1283
143	181	15	2304
150	145	20	1014
159	157	17	1213
167	154	7	1767
175	155	15	1695
206	160	8	1858
217	126	6	1482
237	192	6	2185
244	198	7	939
266	184	7	2275
269	212	9	3030
276	212	9	2621
284	218	11	2237
284	99	7	432
293	216	4	1634
299	192	16	948
300	165	20	1459
311	203	12	1209
328	190	14	870
331	161	20	1045
336	247	7	1556
336	303	4	1713
340	219	8	1239
348	289	7	2330
370	267	9	1451
381	198	14	989
393	322	4	1844
399	297	8	1728
401	275	10	1941
406	223	12	1763
411	262	10	847
420	151	15	2514
431	285	7	712
434	309	5	1885
440	174	20	1370
447	233	8	848
451	184	22	927
452	261	5	1916
463	132	24
464	184	13	2355
466	202	16	2111
469	275	2	2869
475	176	21	848
478	201	16	2095
480	205	12	2802
481	190	15	1013
483	211	13	1029
504	171	4	575
506	133	19	1094
512	198	8	3504
516	102	17	1536
556	172	18	1240
557	218	12	2814
562	154	16	1791
573	178	16	1486
580	254	10	3029
589	235	13	2452
598	246	8	2541
604	111	18	731
609	233	15	1754
611	243	10	3666
627	247	5	1552
631	195	10	1320
658	107	22	609
665	213	13	1454
666	220	11	4540
667	187	16	1895
681	240	10	976
688	149	20	889
689	226	11	946
692	217	11	1197
701	225	9	905
709	229	8	3320
716	119	20	1106
718	232	6	3002
731	191	9	1884
769	225	9	1401
772	173	20	824
774	167	17	881
794	228	7	2705
803	258	15	1345
805	236	15	1268
806	183	19	1437
812	208	5	2290
817	185	21	556
819	245	12	2647
820	245	15	2135
840	237	12	3550
841	236	16	2276
859	173	23	507
885	197	9	1650
887	214	15	1556
892	218	18	2867
900	186	6	2012
913	157	24
934	247	15	1500
936	176	21	1363
938	212	7	1521
945	182	8	1606
946	234	11	5108
996	137	21	1983
1003	239	8	2303
1033	170	21	1494
1036	268	9	3231
1044	211	20	1357
1045	254	9	2011
1052	191	18	1646
1057	293	10	2195
1056	259	16	1795
1072	101	22	361
1075	282	11	2923
1076	274	14	2249
1093	322	6	1594
1108	239	13	1359
1109	229	16	1088
1123	215	18	1005
1126	258	12	776
1135	167	19	772
