# Supplementary material for: The synaptic ribbon is critical for sound encoding at high rates and with temporal precision
Source: eLife journal article supplement (doi:10.7554/elife.29275), 2018-01-12
Supplement: supp [file Example Spot IntensityMbHand Result.xls]

## Sheet: Synapse
Chan		1
Spots		135
EditSpots		135
Nuc
Spot/Nuc
		x	y	z
		6.2787	291.852	12.6432
		22.93	290.652	13.4136
		26.3321	294.461	14.4525
		29.639	148.72	5.41151
		30.72	291.367	13.9162
		34.1349	154.333	21.4808
		40.1184	278.062	11.547
		49.6561	285.711	15.4287
		71.9846	250.132	13.5253
		75.4779	242.808	13.3726
		105.102	214.536	5.46061
		115.03	209.483	6.24953
		129.932	204.738	10.2853
		130.771	204.608	7.46424
		137.969	156.565	18.3126
		137.159	123.351	19.6003
		142.388	201.813	10.564
		143.405	181.142	14.4324
		150.483	145.295	18.5825
		159.207	156.614	15.749
		166.601	154.485	5.50465
		174.648	155.476	14.3968
		206.486	160.469	7.43062
		217.307	126.144	4.58976
		236.853	192.495	5.0716
		243.523	198.124	5.54081
		265.814	184.207	5.76467
		269.401	211.599	7.82153
		276.233	212.464	8.45179
		283.635	218.413	10.4521
		283.775	98.9578	6.49834
		293.191	215.573	3.43684
		299.336	192.31	14.9474
		300.255	165.066	18.7274
		311.244	203.232	10.5064
		327.724	189.974	12.9495
		331.305	160.821	19.1576
		335.956	247.333	6.25519
		336.287	303.282	2.61279
		340.287	218.885	6.61896
		348.245	289.073	5.72393
		369.521	267.155	8.02462
		380.673	197.721	12.5267
		392.81	322.004	2.8915
		399.217	296.543	7.3353
		400.756	274.532	9.45585
		406.08	222.782	10.9407
		410.934	262.312	8.5426
		419.808	150.574	14.4118
		431.488	284.545	5.5053
		433.512	309.095	4.34471
		440.352	173.667	18.6334
		446.739	232.601	6.5941
		450.593	184.47	20.6768
		452.124	261.282	4.32046
		462.988	131.712	22.5
		464.333	184.485	12.3895
		465.809	202.053	15.0729
		469.359	275.284	1.30052
		475.163	176.148	19.7183
		477.997	201.331	14.8637
		479.542	204.826	11.3479
		480.584	190.232	13.5558
		482.605	210.668	11.5488
		504.374	170.945	3.23169
		506.261	132.857	18.2852
		511.509	198.384	7.48745
		515.641	102.187	16.3184
		556.118	171.723	17.4279
		557.164	217.751	10.8554
		562.098	154.396	15.304
		572.572	177.813	15.363
		580.222	253.93	9.18303
		588.989	234.785	12.4056
		597.653	246.475	7.40636
		603.572	110.58	16.5514
		609.313	233.021	13.5097
		610.658	243.337	9.2646
		626.603	247.372	3.68585
		630.666	194.806	9.14039
		657.791	106.98	20.5159
		665	212.549	11.6521
		665.786	219.505	10.3341
		666.721	187.452	15.3633
		680.694	239.547	8.54459
		688.213	149.289	18.6068
		689.474	226.083	9.51725
		691.625	216.813	9.59435
		700.913	224.865	7.50854
		708.678	228.871	7.18976
		715.543	118.604	18.9787
		718.361	232.402	5.40799
		731.496	190.604	8.43368
		769.428	224.774	8.10641
		771.52	172.603	18.9895
		774.49	166.885	15.7734
		793.742	227.529	6.30934
		803.345	258.317	13.5786
		804.837	235.616	14.2446
		805.783	182.836	18.3823
		811.515	207.548	4.2674
		817.003	184.518	19.5899
		819.106	244.653	11.435
		820.288	245.046	13.6881
		839.659	237.192	11.4592
		841.145	235.799	14.965
		858.534	172.512	21.5156
		884.549	196.522	8.29889
		887.198	213.71	13.5337
		892.136	218.468	16.6985
		900.125	186.429	5.47583
		913.295	157.189	22.5
		934.389	247.258	14.3184
		935.713	175.803	20.3952
		938.348	211.724	6.14822
		944.939	181.678	7.41721
		945.605	233.51	10.4427
		995.661	137.257	20.246
		1003.14	239.03	7.49449
		1032.68	170.065	20.3944
		1035.94	268.398	8.31781
		1044.02	210.692	19.4261
		1045	253.512	8.4897
		1051.83	190.658	17.3496
		1056.83	292.931	9.4306
		1056.44	259.493	14.9136
		1071.66	100.629	21.3903
		1074.71	282.402	9.65659
		1076.25	273.623	13.3025
		1092.8	321.766	4.78734
		1107.91	239.394	12.3917
		1109.08	228.579	15.4215
		1122.88	215.237	17.1376
		1125.57	258.044	10.6053
		1134.83	166.849	18.4472
