# Supplementary material for: The synaptic ribbon is critical for sound encoding at high rates and with temporal precision
Source: eLife journal article supplement (doi:10.7554/elife.29275), 2018-01-12
Supplement: supp [file ImarisBatchIntensROI.xlsx]

## Sheet: General
doFileNrStart	[2]
doFileNrStop	[2]
DoPrint	[1]
DoBatch	[1]
localPath	W:\public\Software\Imaris\elifesciences
doExcel	[1]

## Sheet: UsedFiles
Info	group	imaris fname	org file name	NrOfChannel	chanOrder	doFWHM	doPerCell	doBackGrd	doNoSynSumROI	ROIsize	HistXmax	HistSteps	FWHM ROIsize	FWHM HistXmax	FWHM HistSteps	MembraneChan	moveROI	deltaZ
Test	[0]	W:\public\Software\Imaris\elifesciences\Example Spot Intensity.ims		[1]	[1 2 3]	[0]	[0]	[0]	[0]	[3 3 0]	[0]	[10]	[10 10 3]	[0]	[10]	[0]	[0]	[1]
