# Supplementary figures and images for: The synaptic ribbon is critical for sound encoding at high rates and with temporal precision
Source: eLife journal article supplement (doi:10.7554/elife.29275), 2018-01-12

**A**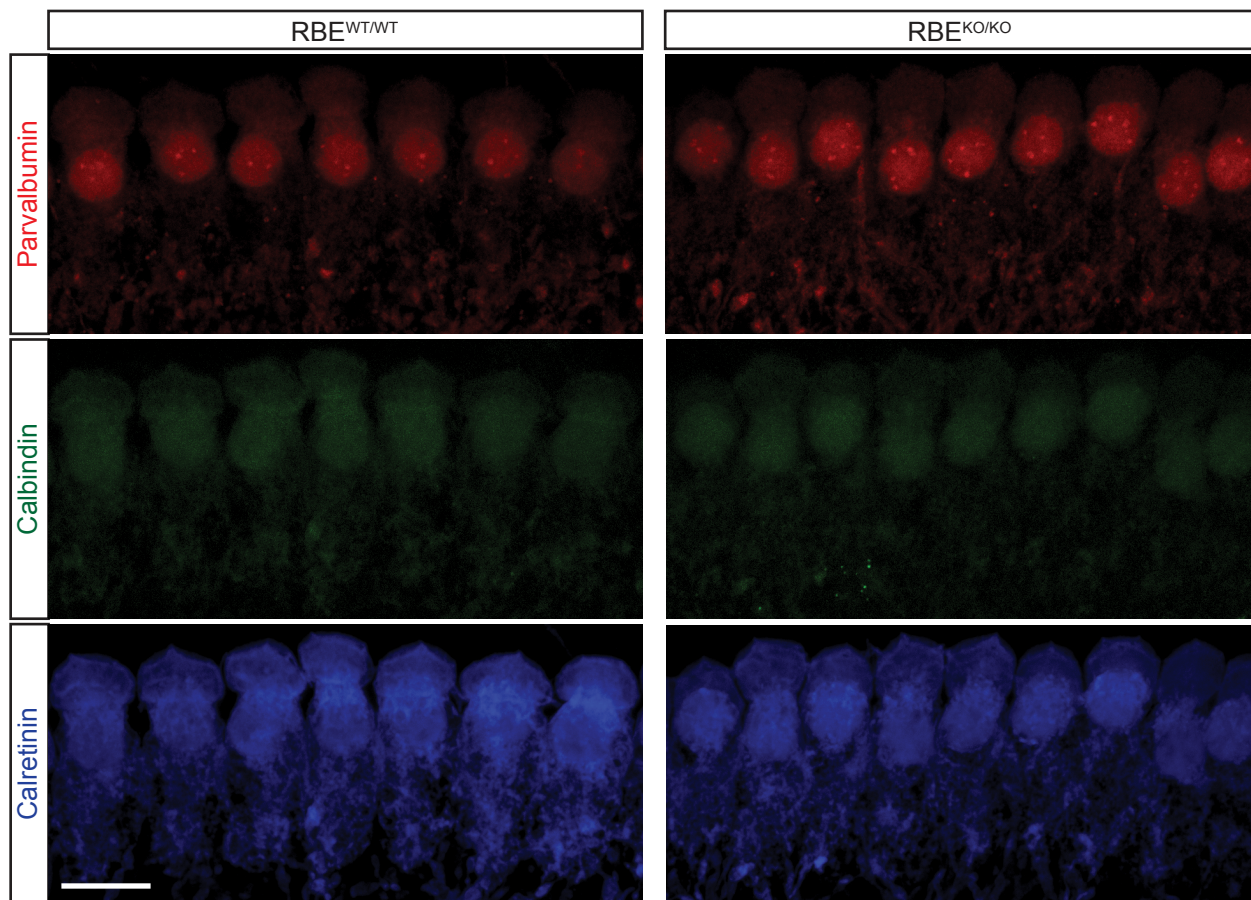**B**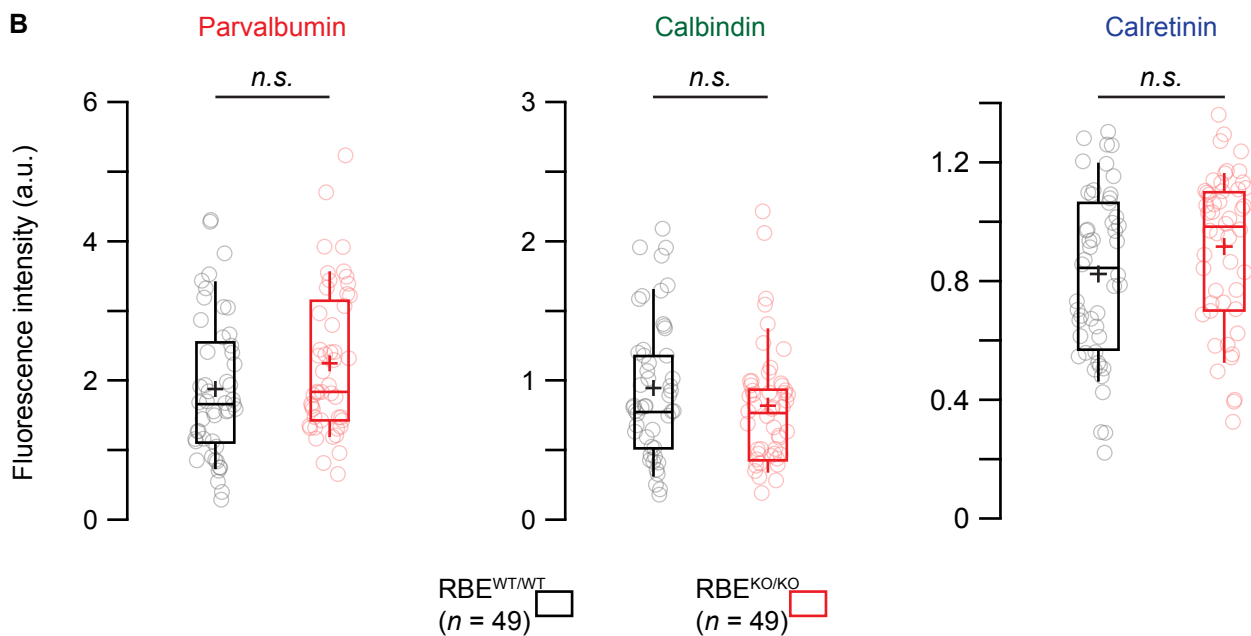

Supplement: supp [file elife-29275-supp-v1.zip]

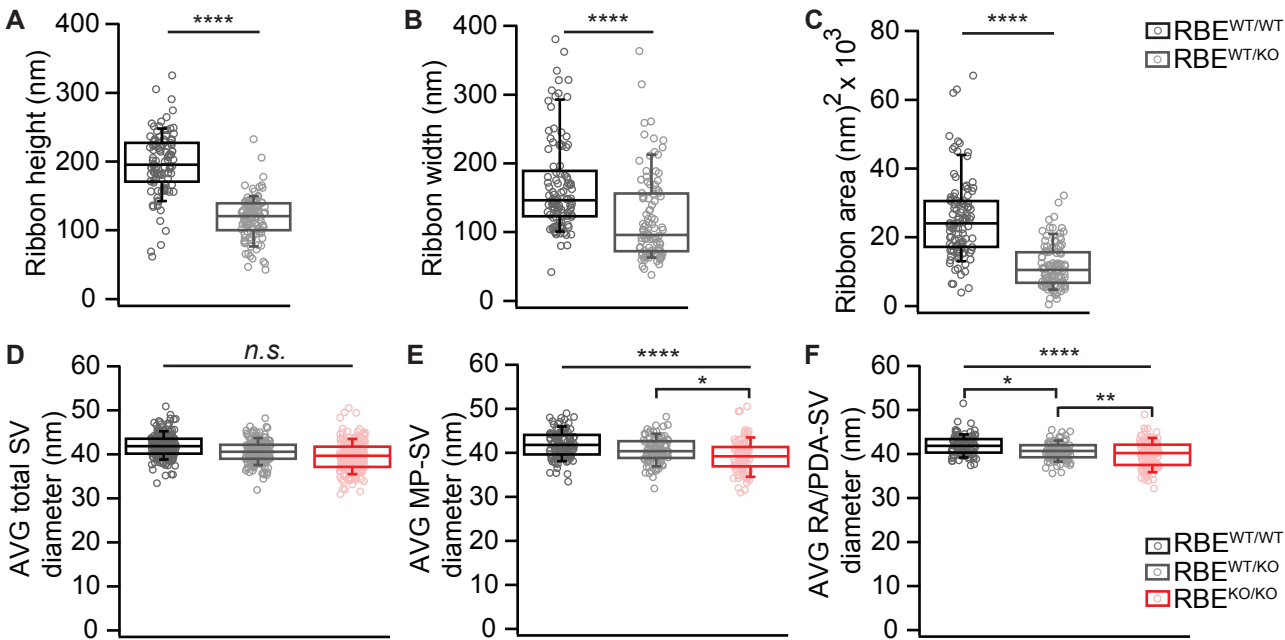

Supplement: supp [file elife-29275-supp-v1.zip]

**A** Tomogram analysis modified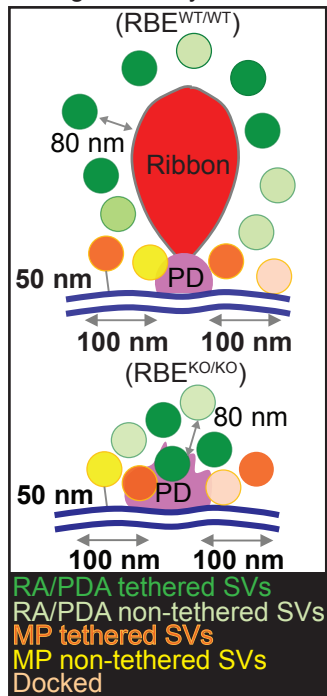

○  $RBE^{WT/WT}$   $N = 3$  animals,  
 $n = 9$  ribbons  
□  $RBE^{KO/KO}$   $N = 3$  animals,  
 $n = 11$  PDs

**B**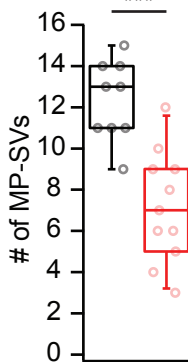**C**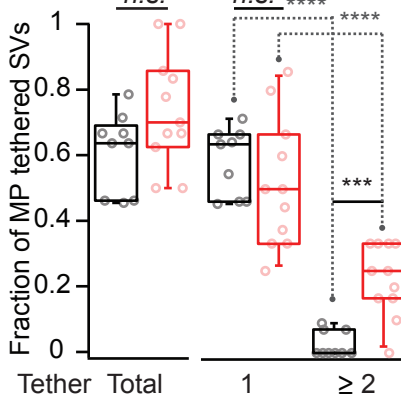**D**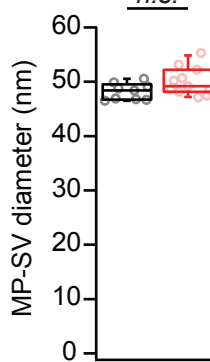**E**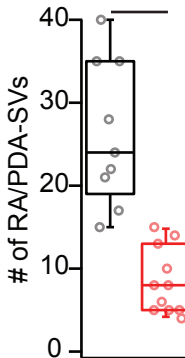**F**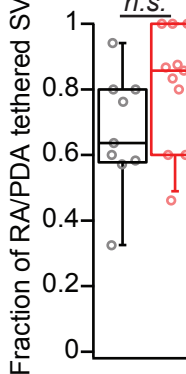**G**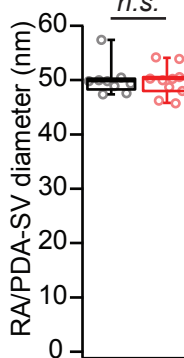

Supplement: supp [file elife-29275-supp-v1.zip]

A

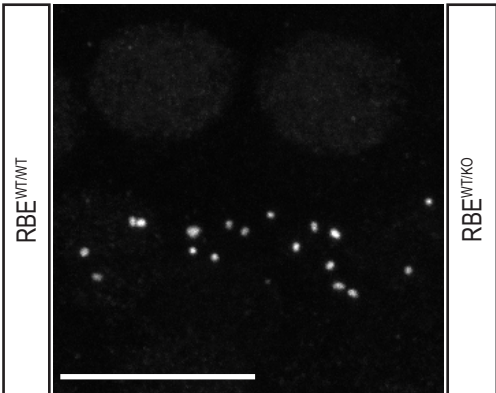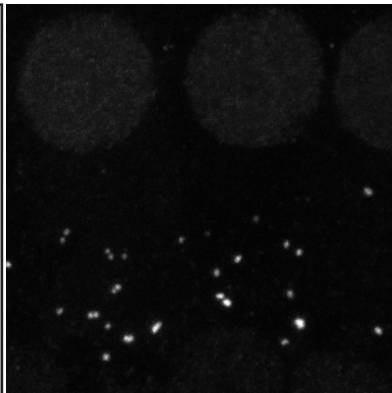

B

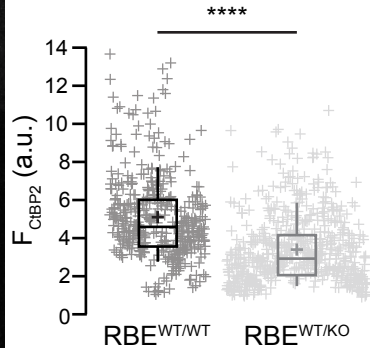

Supplement: supp [file elife-29275-supp-v1.zip]

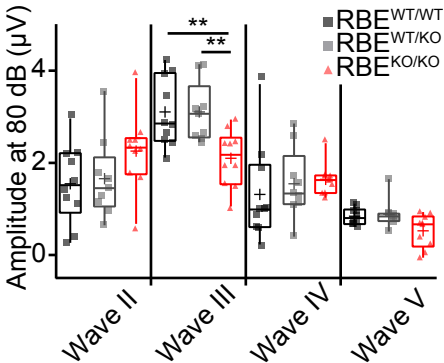

Supplement: supp [file elife-29275-supp-v1.zip]

**A**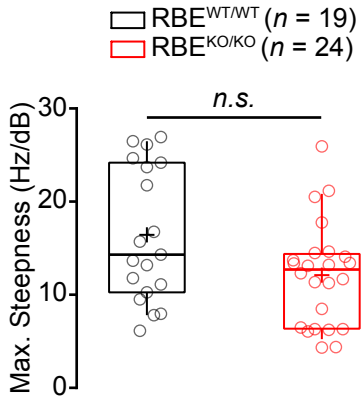**B**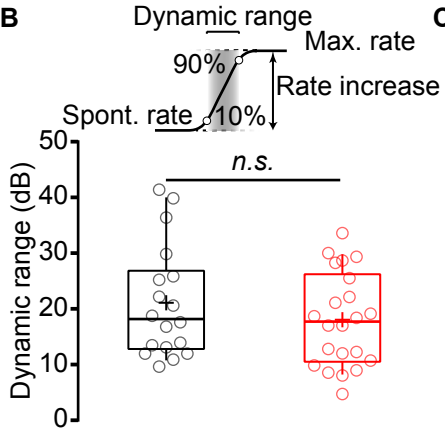**C**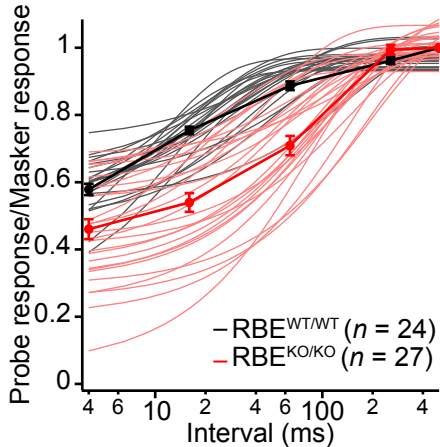

Supplement: supp [file elife-29275-supp-v1.zip]
